# Supplementary material for: True UV color vision in a female butterfly with two UV opsins
Source: Oxford University Press journal article supplement (doi:10.1242/jeb.242802), 2021-09-15
Supplement: jeb242802supp.pdf [file jeb242802supp.pdf]

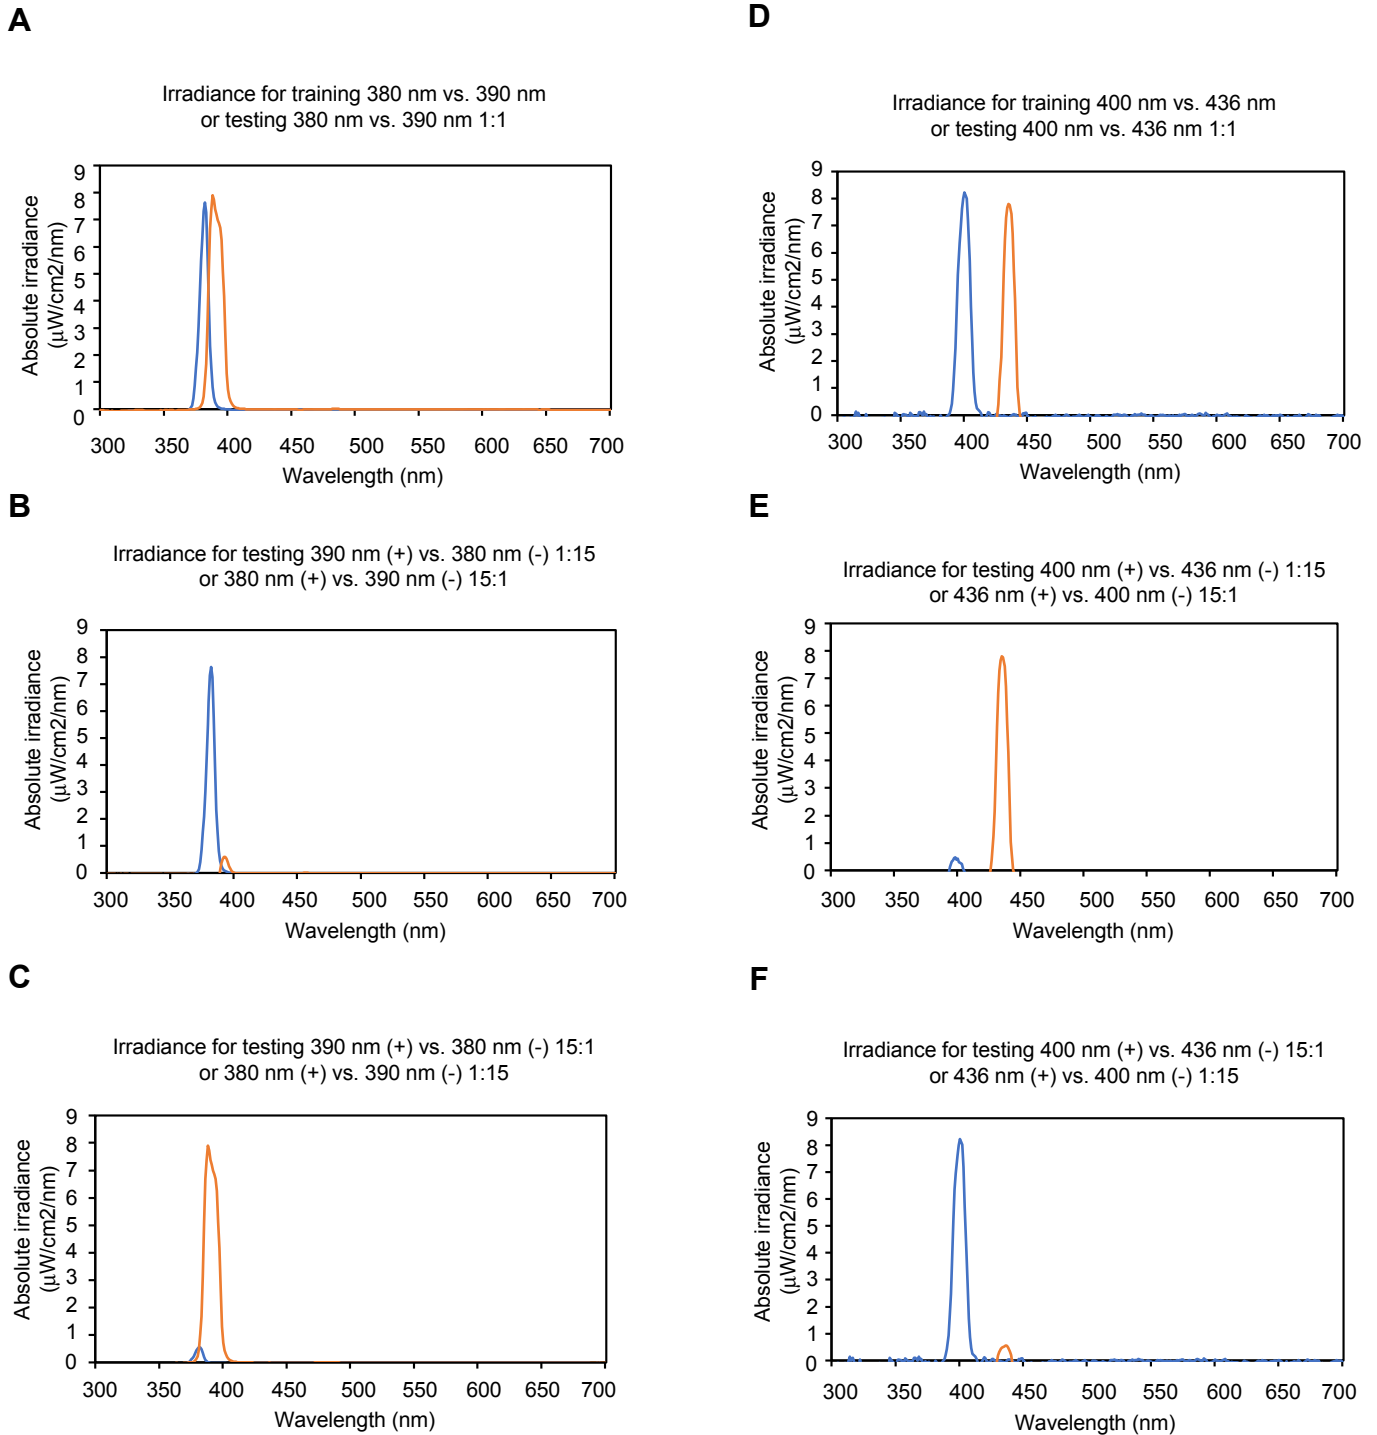

**Fig. S1. Absolute irradiance spectra for 380 nm, 390 nm, 400 nm and 436 nm filtered lights used for butterfly behavior training and testing.** Lights measured using an Ocean Optics USB2000 spectrometer and 100  $\mu\text{m}$ -diameter fiber optic cable. (A) Irradiance for training 380 nm vs. 390 nm 1:1 or testing 380 nm vs. 390 nm 1:1. (B) Irradiance for testing 390 nm (+) vs. 380 nm (-) 1:15 or 380 nm (+) vs. 390 nm (-) 15:1. (C) Irradiance for testing 390 nm (-) vs. (380 nm) (-) 15:1 or 380 nm (+) vs. 390 nm (-) 1:15. (D) Irradiance for training 400 nm vs. 436 nm or testing 400 nm vs. 436 nm 1:1. (E) Irradiance for testing 400 nm (+) vs. 436 nm (-) 1:15 or 436 nm (+) vs. 400 nm (-) 15:1. (F) Irradiance for testing 400 nm (+) vs. 436 nm (-) 15:1 or 436 nm (+) vs. 400 nm (-) 1:15.

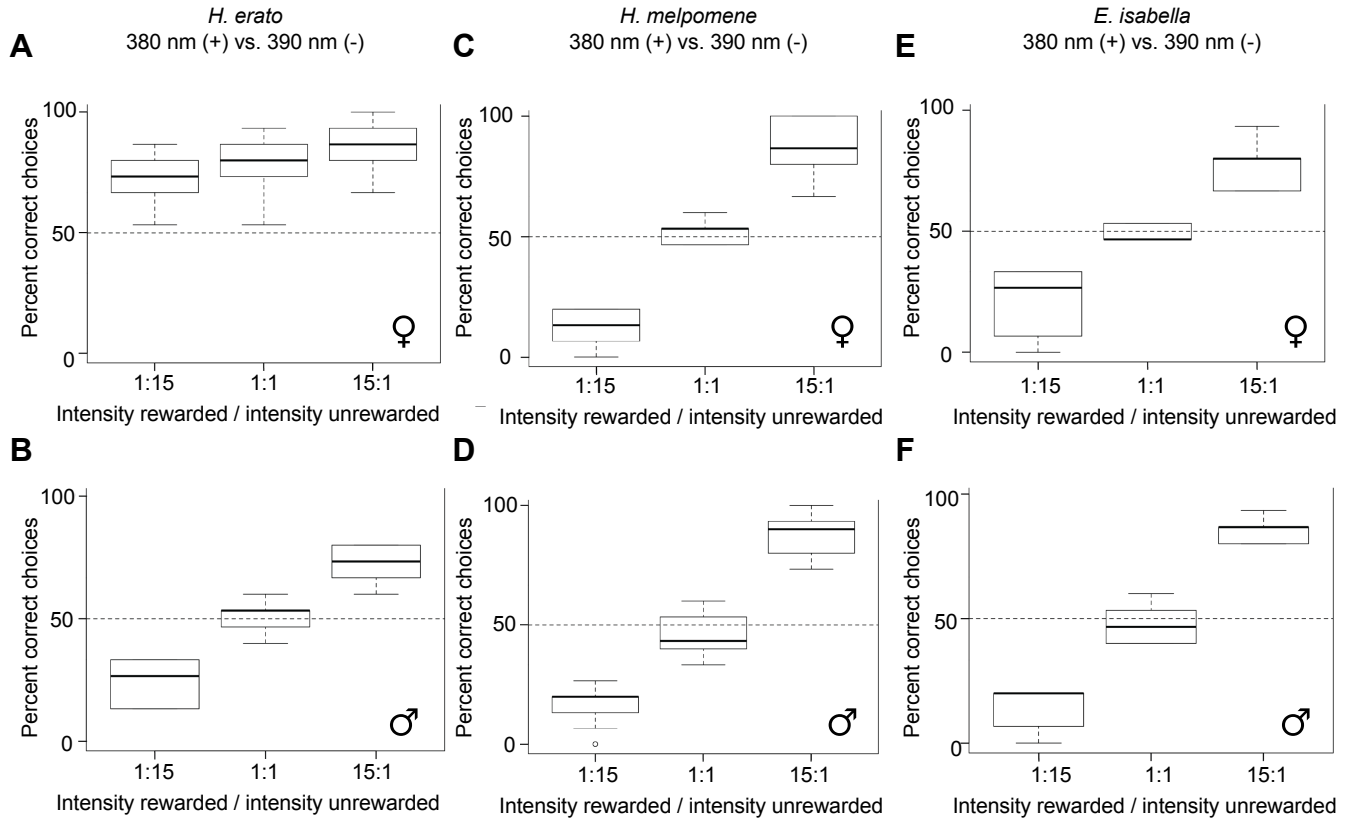

**Fig. S2. Percent correct choices for the rewarded (+) wavelength of 380 nm by species and sex.** *Heliconius erato* females (A) and males (B), *H. melpomene* females (C) and males (D), and *E. isabella* females (E) and males (F) when given a choice between 380 nm (+) and 390 nm (-) light under varying intensities. Spectra of the filtered lights under each of the intensity ratios are given in Fig. S1. For *H. erato* and *H. melpomene* N=10 and for *E. isabella* N=5 biological replicates per species and sex under which 15 choice trials were completed at each light intensity combination. Non-overlapping box plots indicate where P<0.01 from a general linear model calculated in R. Boxes represent upper and lower quartiles with median; whiskers indicate 25th and 75th percentiles

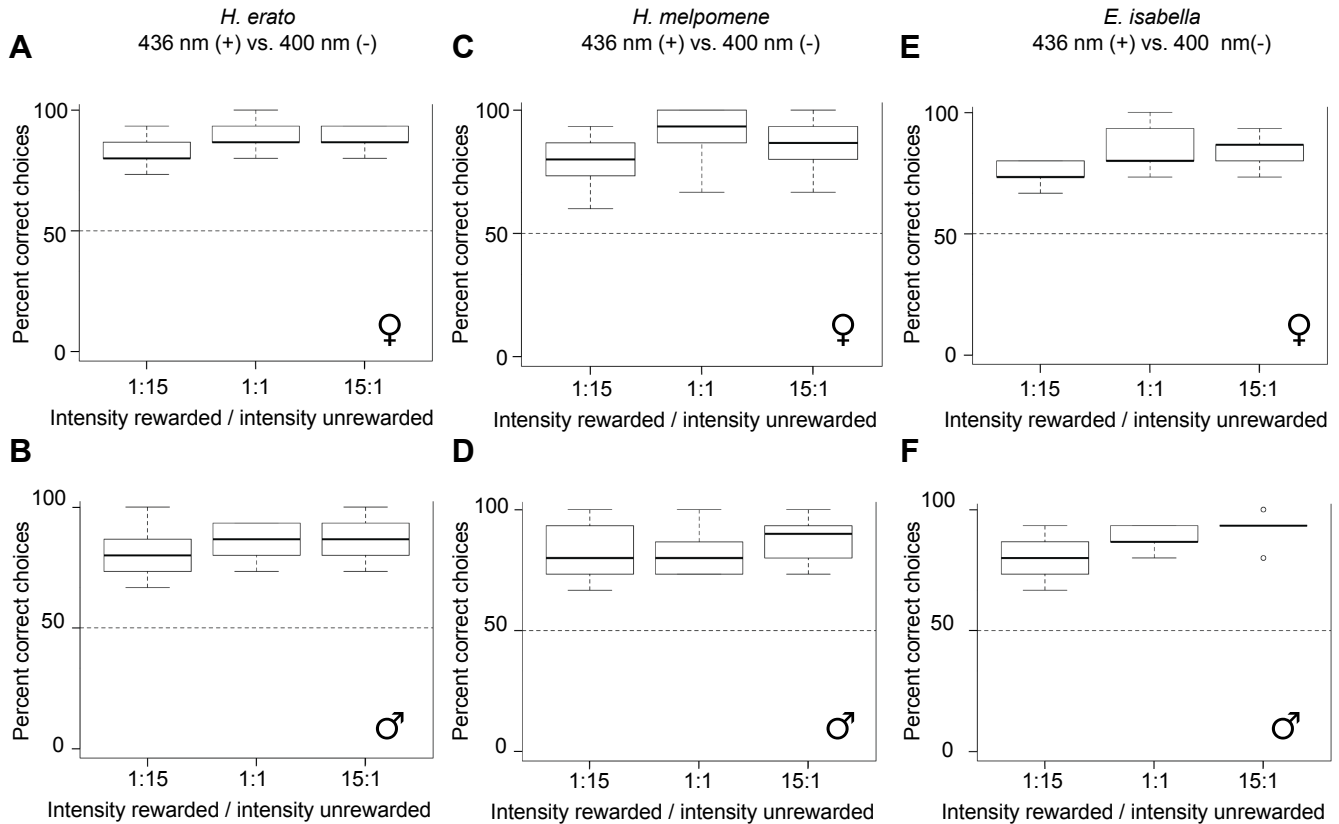

**Fig. S3. Percent correct choices for the rewarded (+) wavelength of 436 nm by species and sex.** *H. erato* females (A) and males (B), *H. melpomene* females (C) and males (D), and *Eueides isabella* females (E) and males (F) when given a choice between 436 nm (+) and 400 nm (-) light under varying intensities. Spectra of the filtered lights under each of the intensity ratios are given in Fig. S1. For *H. erato* and *H. melpomene* N=10 and for *E. isabella* N=5 biological replicates per species and sex under which 15 choice trials were completed at each light intensity combination. Non-overlapping box plots indicate where  $P < 0.01$  from a general linear model calculated in R. Boxes represent upper and lower quartiles with median; whiskers indicate 25th and 75th percentiles.

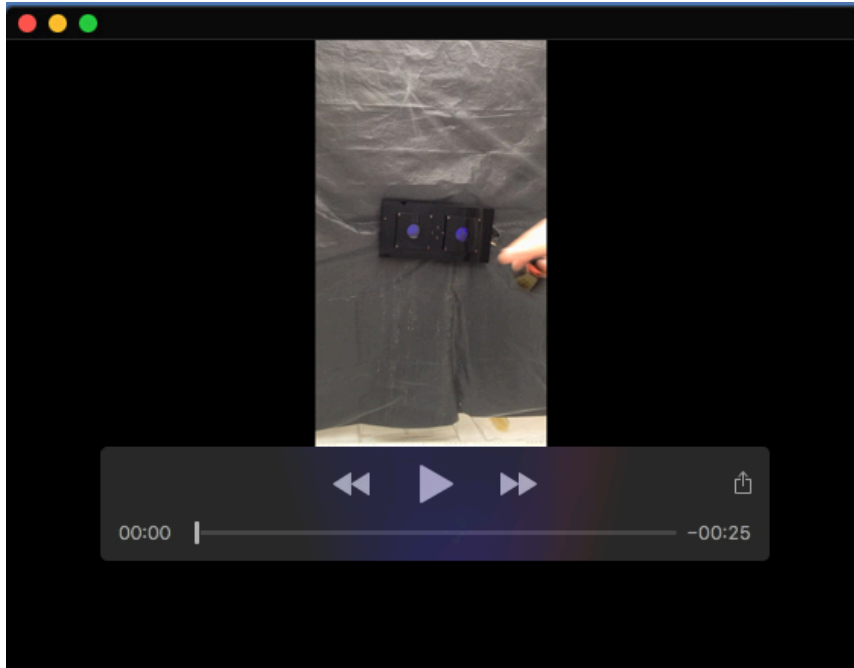

**Movie 1.** Apparatus for training and experiments based on a design described in Zaccardi et al. (2006). It consists of two 2.5 cm diameter stimuli presented side-by-side, separated by 6 cm on two black platforms set on a larger black plate, measuring 20x10 cm.
